# Supplementary material
Source: PubMed Central journal article supplement (PMC5494022)

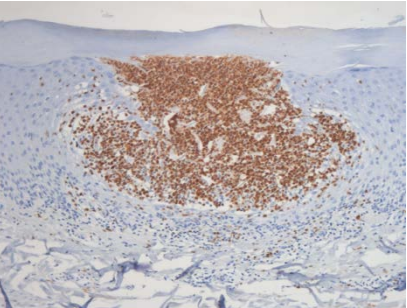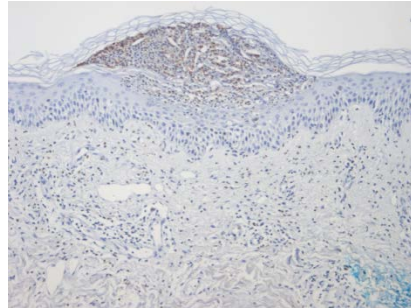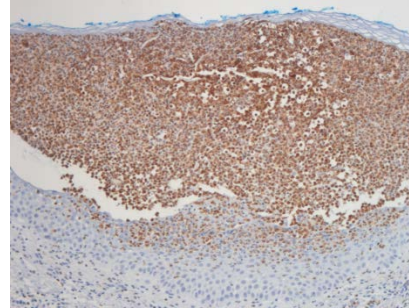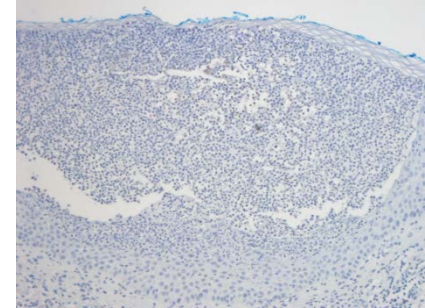

Cathepsin G 1ug/ml GPP

Rabbit IgG 1ug/ml GPP

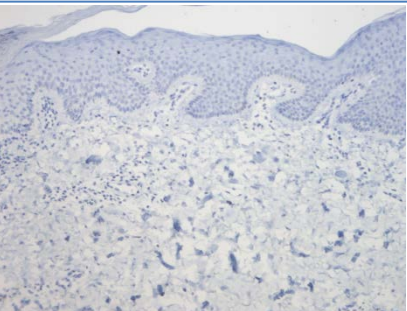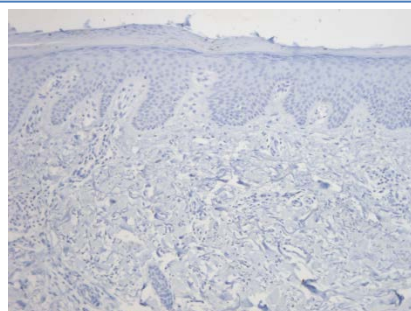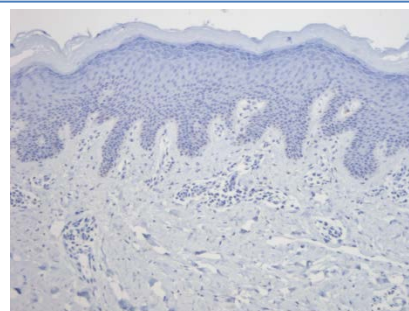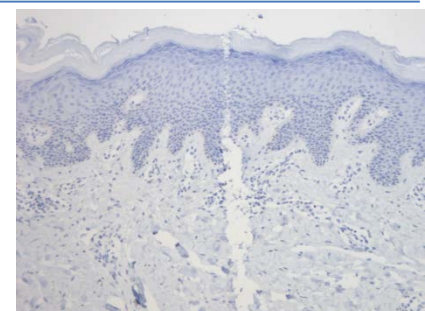

Cathepsin G 1ug/ml PP

Rabbit IgG 1ug/ml PP

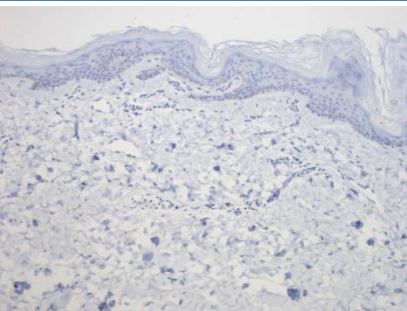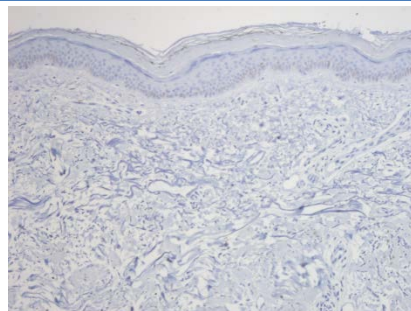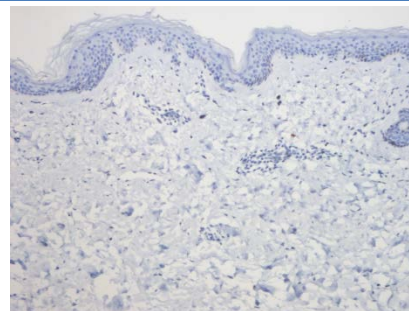

Cathepsin G 1ug/ml PN

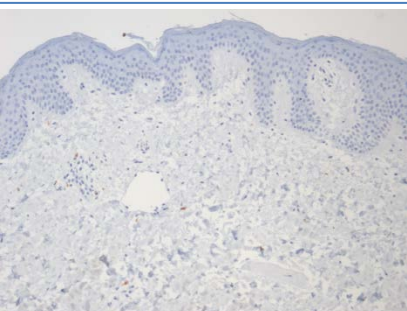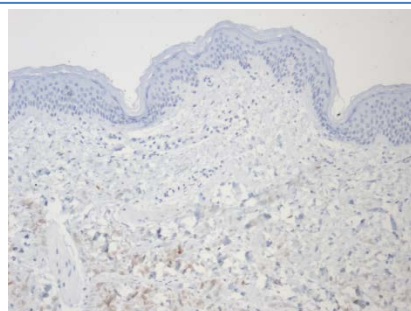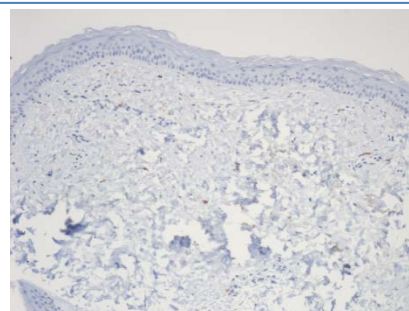

Cathepsin G 1ug/ml NN



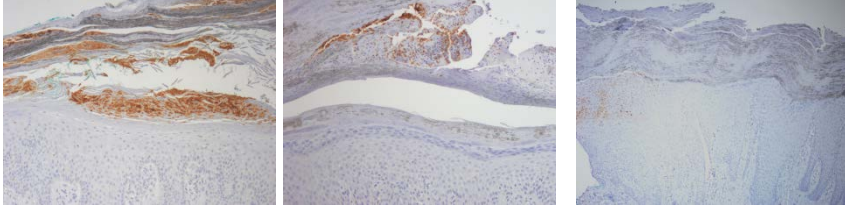

CXCL8 1ug/ml GPP

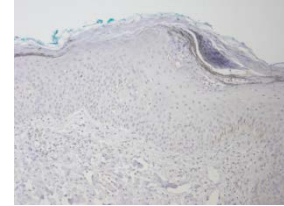

Goat IgG 1ug/ml GPP

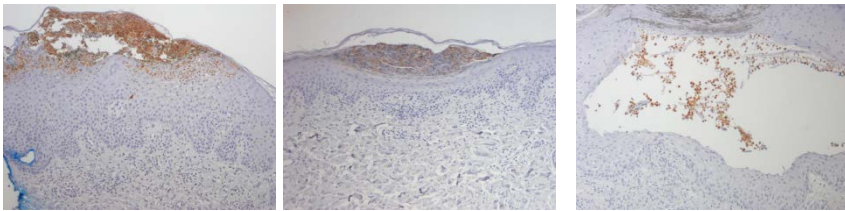

CXCL8 1ug/ml PP

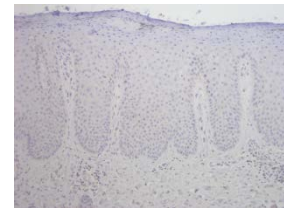

Goat IgG 1ug/ml PP

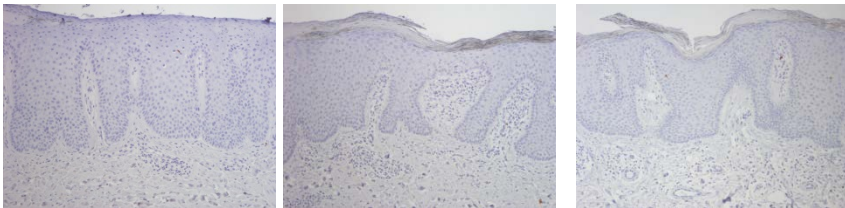

CXCL8 1ug/ml NN

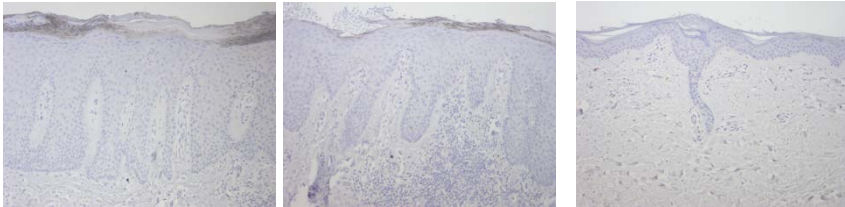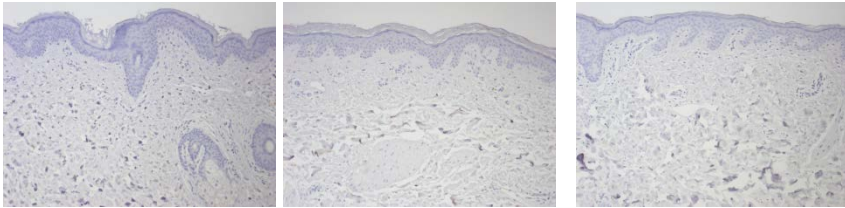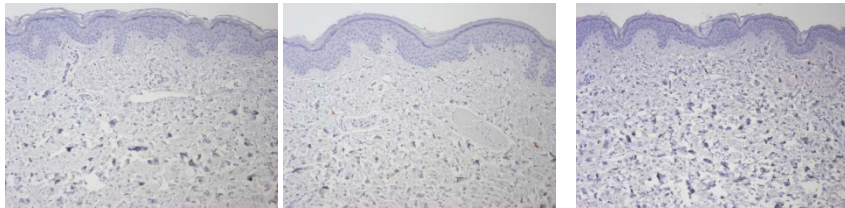

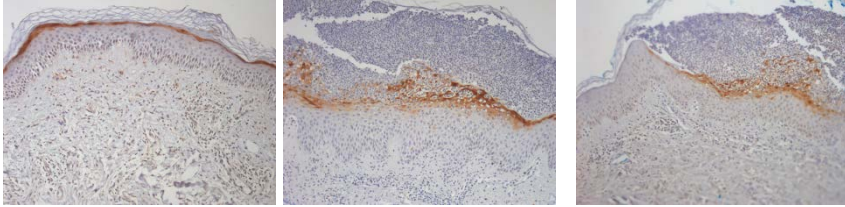

IL36A 1ug/ml GPP

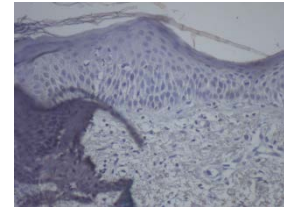

Goat IgG 1ug/ml GPP

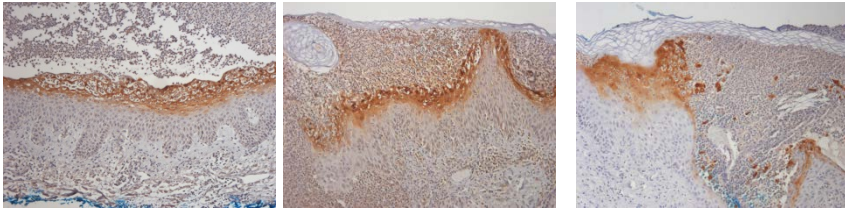

IL36A 1ug/ml PP

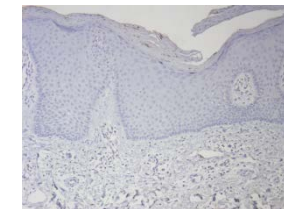

Goat IgG 1ug/ml PP

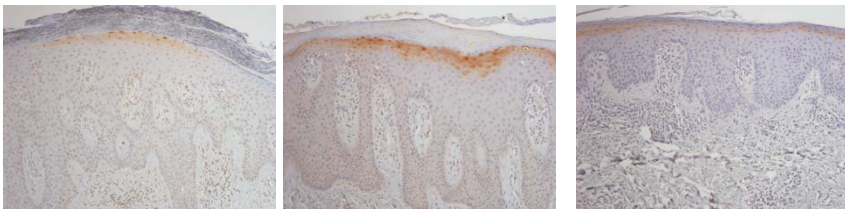

IL36A 1ug/ml NN

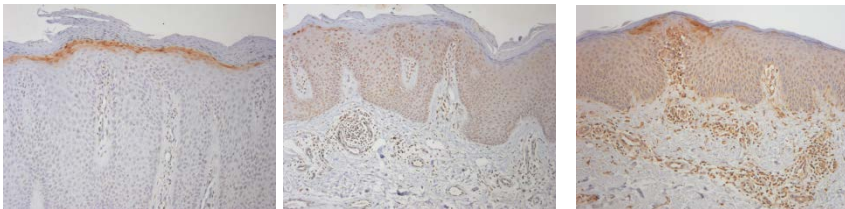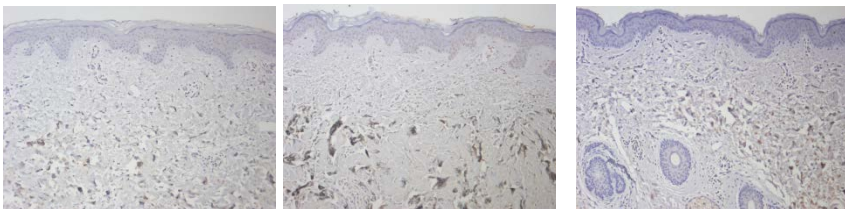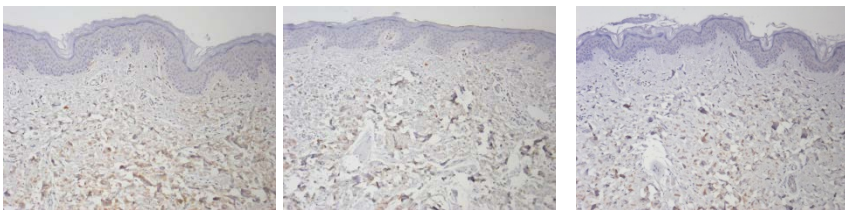



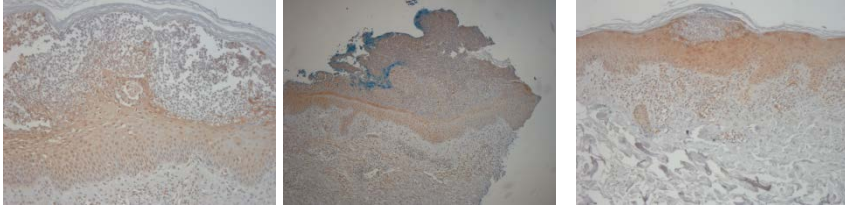

IL36G 2.5ug/ml GPP

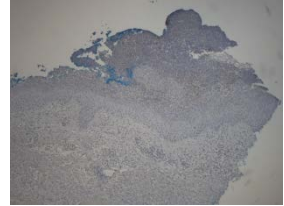

Goat IgG 2.5ug/ml GPP

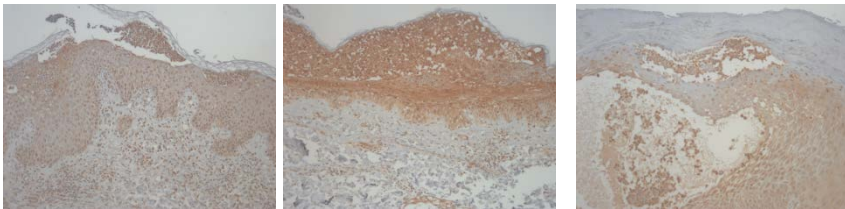

IL36G 2.5ug/ml PP

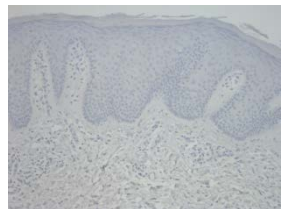

Goat IgG 2.5ug/ml PP

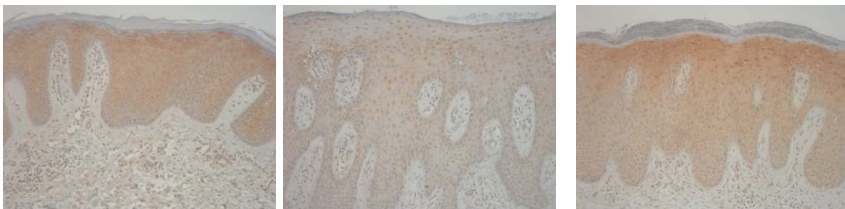

IL36G 2.5ug/ml NN

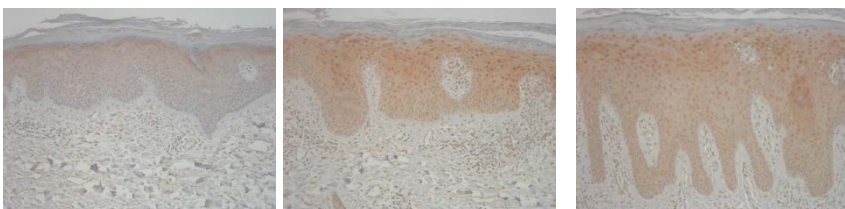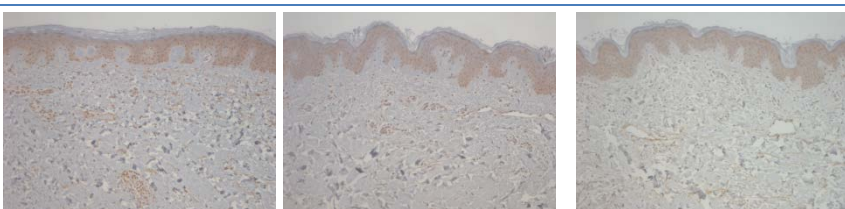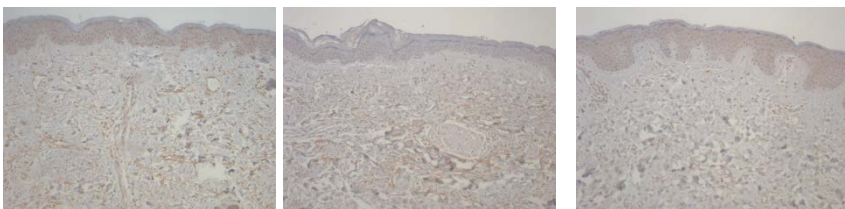



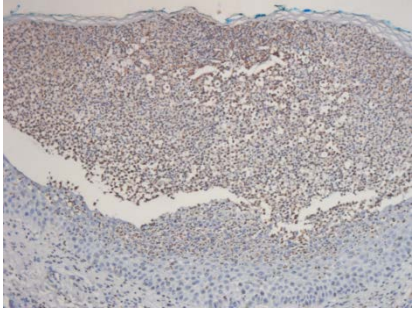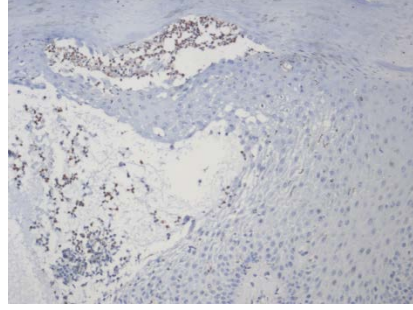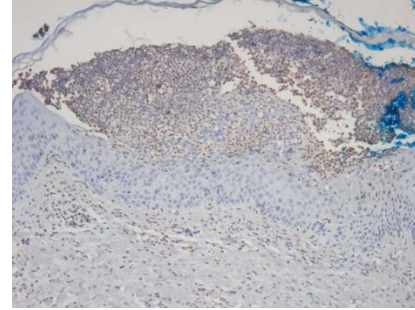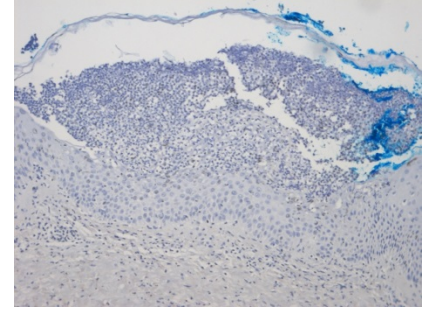

PRTN3 1ug/ml GPP

Goat IgG 1ug/ml GPP

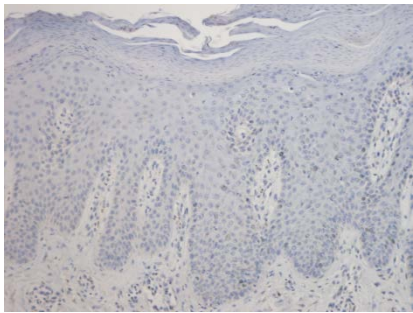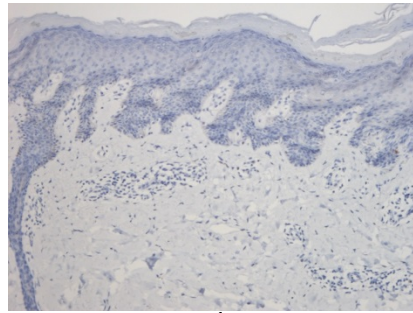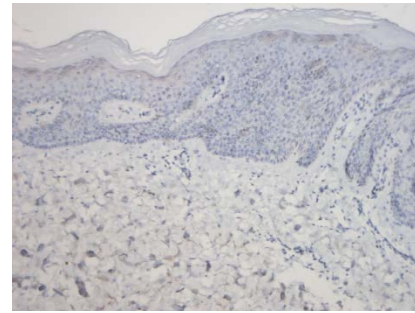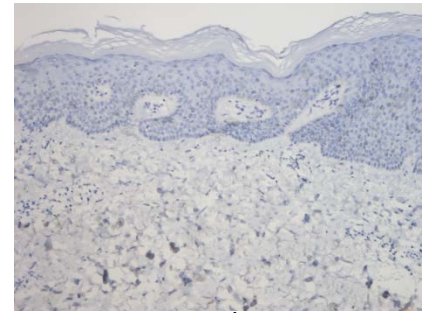

PRTN3 1ug/ml PP

Goat IgG 1ug/ml PP

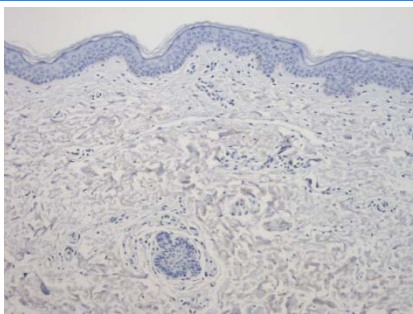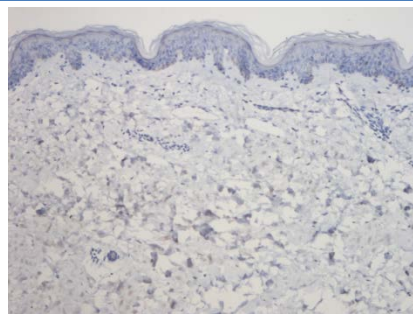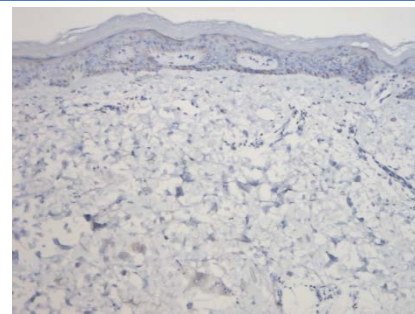

PRTN3 1ug/ml PN

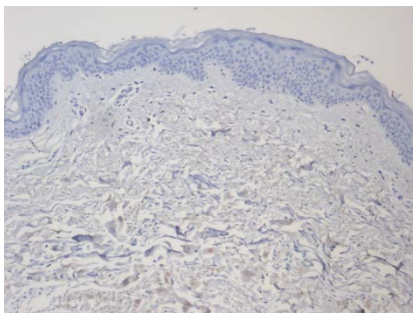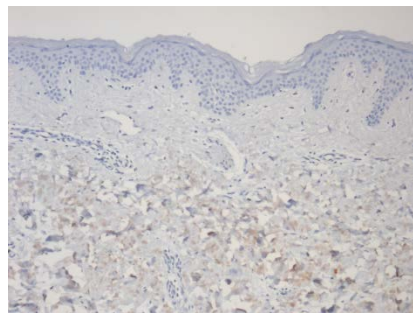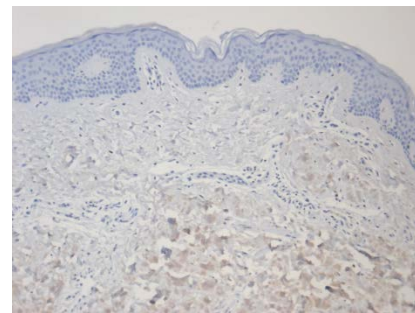

PRTN3 1ug/ml NN



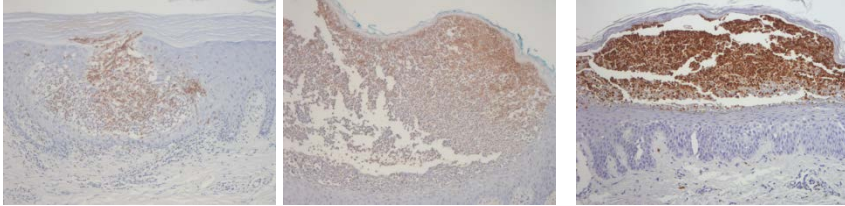

NP57 1ug/ml GPP

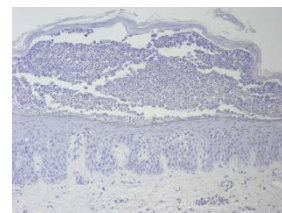

Mouse IgG1 1ug/ml GPP

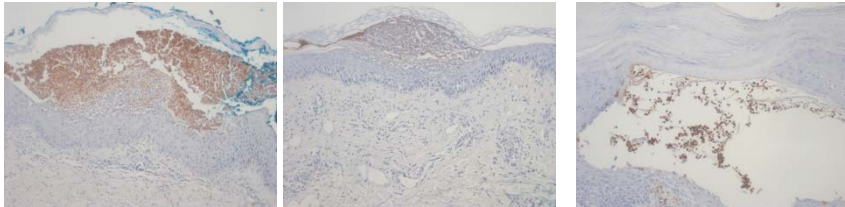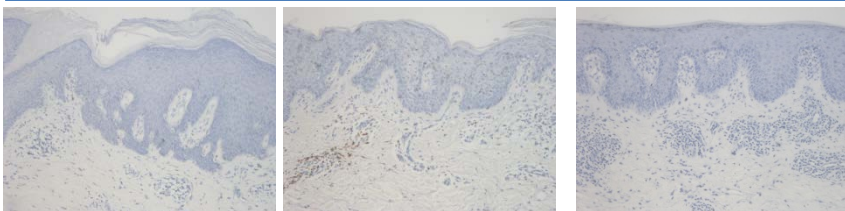

NP57 1ug/ml PP

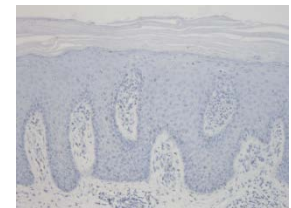

Mouse IgG1 1ug/ml PP

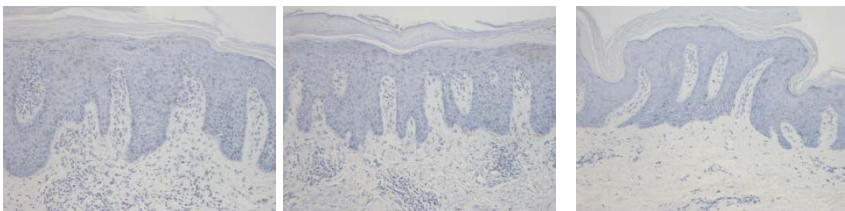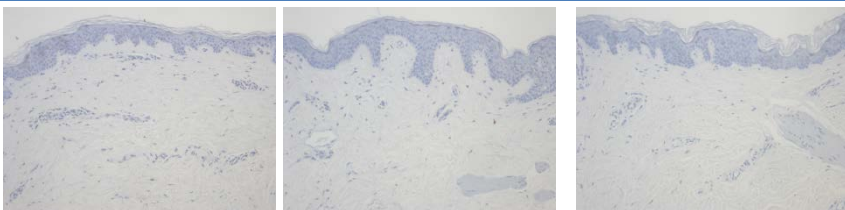

NP57 1ug/ml NN

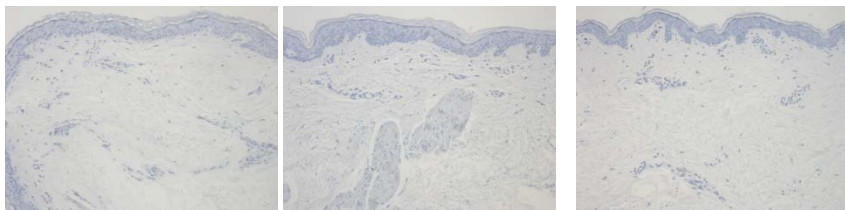

Supplement: NIHMS843310-supplement-supplemental_figure_1.pdf [file NIHMS843310-supplement-supplemental_figure_1.pdf]
